# Supplementary material for: High performance organic transistor active-matrix driver developed on paper substrate
Source: PubMed Central journal article supplement — Sci Rep. 2014 Sep 19;4:6430. doi: 10.1038/srep06430 (PMC5377355; doi:10.1038/srep06430), 2014-09-19
Supplement: srep06430-s1.pdf [file srep06430-s1.pdf]

**SUBJECT AREAS:**

MATERIAL SCIENCE

APPLIED PHYSICS

ELECTRONIC DEVICES

Correspondence and requests for materials should be addressed to P. K. L. C.  
(pklc@hku.hk)

**High performance organic transistor active-matrix driver developed on paper substrate**

Boyu Peng<sup>1</sup>, Xiaochen Ren<sup>1</sup>, Zongrong Wang<sup>1</sup>, Xinyu Wang<sup>1</sup>, Robert C. Roberts<sup>2</sup> and Paddy K. L. Chan<sup>1\*</sup>

<sup>1</sup>Department of Mechanical Engineering, The University of Hong Kong, Pokfulam Road, Hong Kong, <sup>2</sup>Department of Electrical and Electronic Engineering, The University of Hong Kong, Pokfulam Road, Hong Kong.

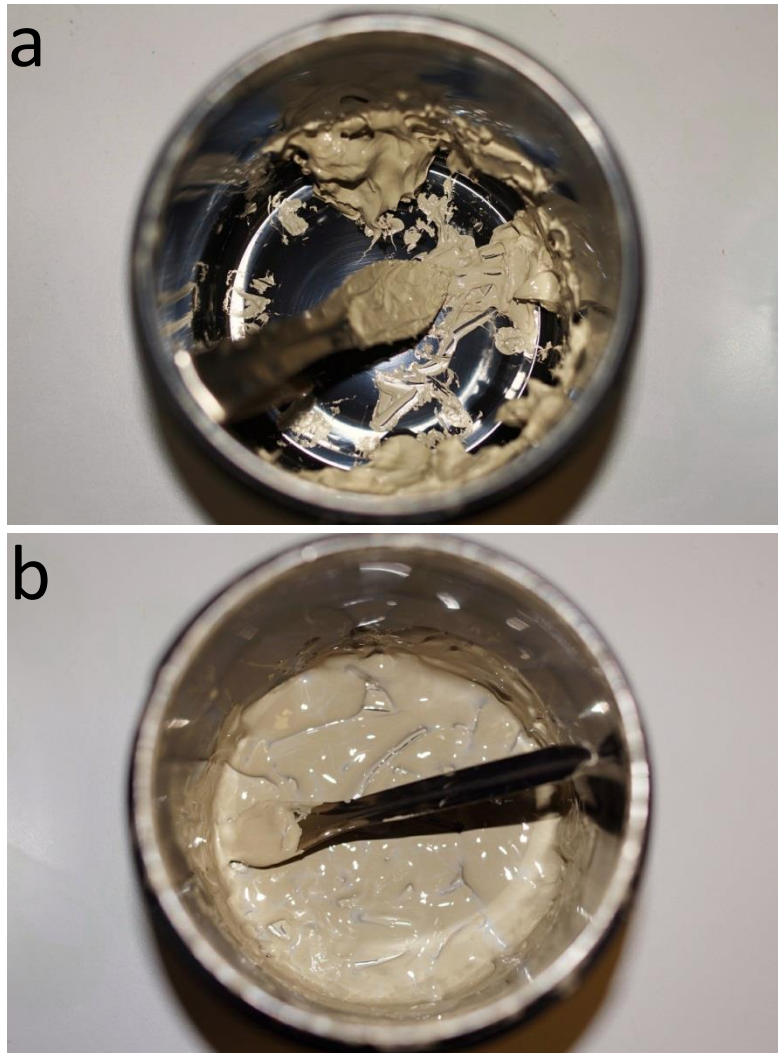

**FigureS1| Optical images of screen-printing silver paste.** (a) Fresh as-received silver paste for electrode patterning. (b) Silver paste diluted by solvent (cyclohexanone) in order to improve yield in the through-paper via-hole printing process.

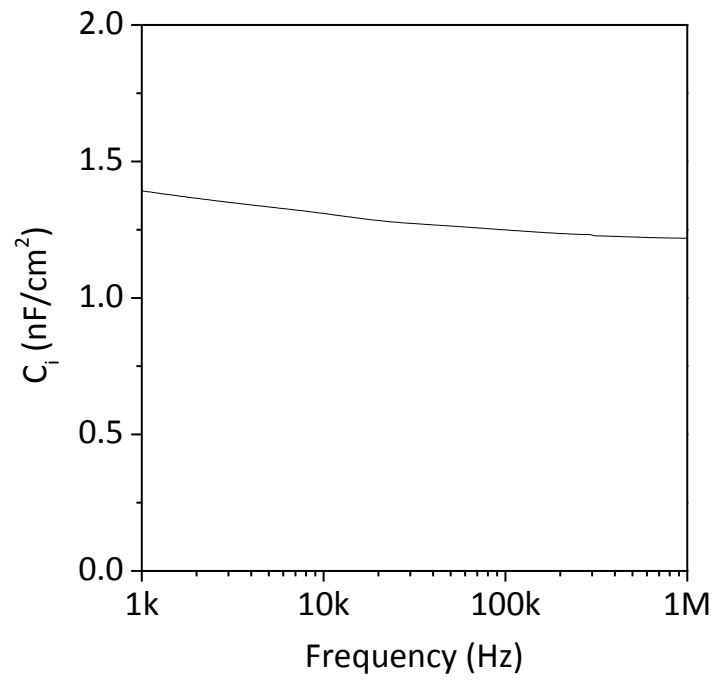

**Figure S2| Capacitance-frequency measurement of 2- $\mu$ m-thick parylene-C.**  
The evaluated dielectric constant of the parylene-C is 3.16 at 1kHz.

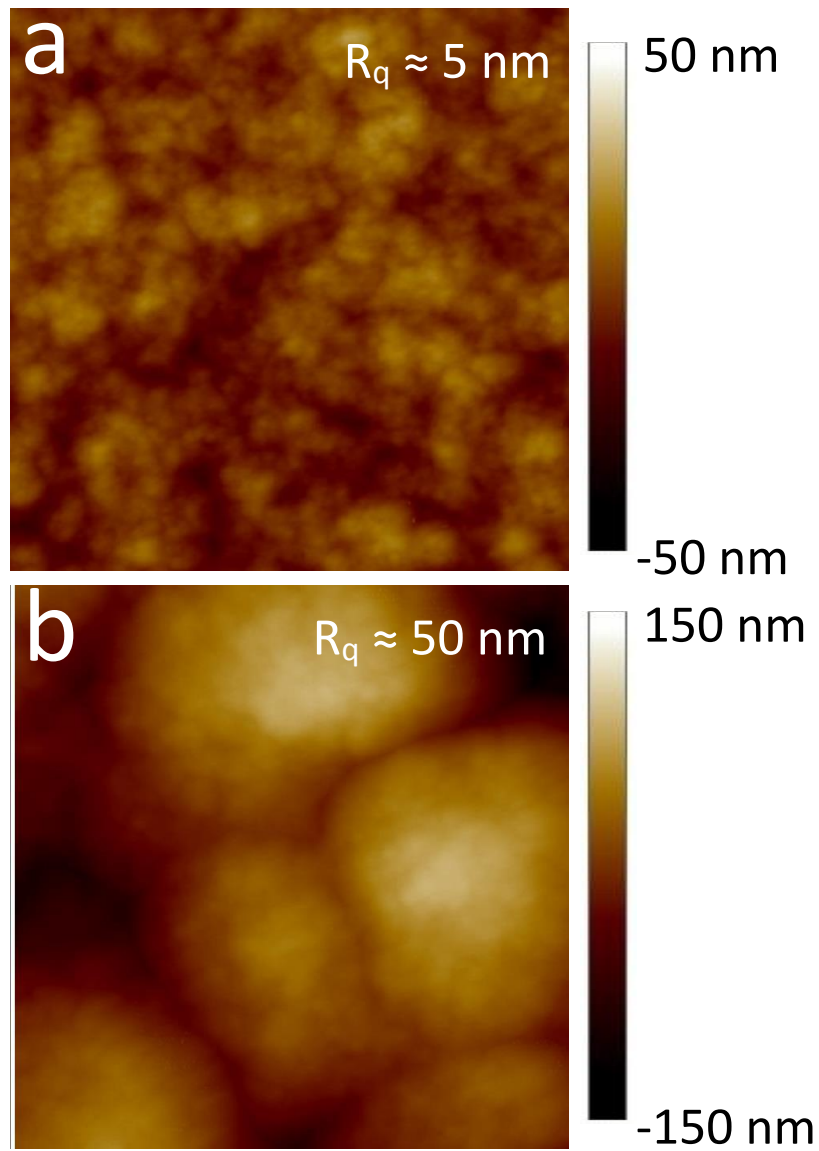

**Figure S3| Parylene-C surface morphology measurement.** (a) Surface AFM image of 2- $\mu\text{m}$ -thick parylene-C on ITO glass. (b) Surface AFM image of 2- $\mu\text{m}$ -thick parylene-C on screen-printed silver electrode on printer paper.

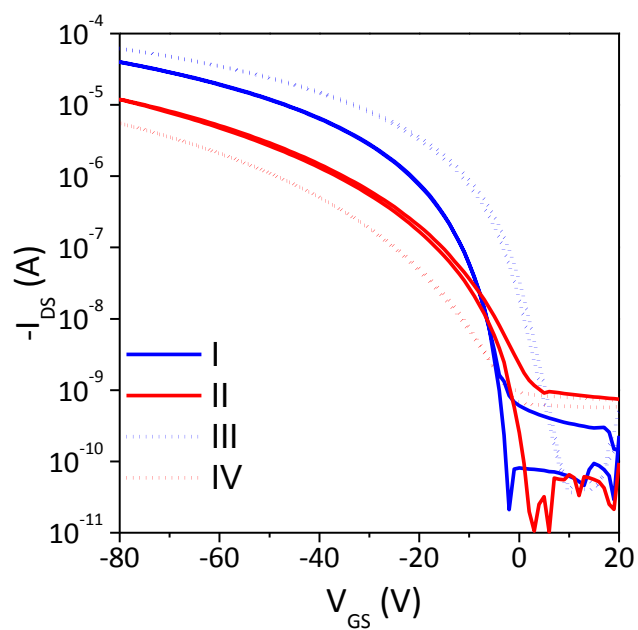

**Figure S4| Transfer curves of Structures I-IV.**  $V_{DS} = -80$  V,  $W = 4$  mm,  $L = 100$   $\mu\text{m}$ . Labels and measurements correspond to Table 1. DNTT on both substrates exhibits higher mobility and better subthreshold swing than pentacene.

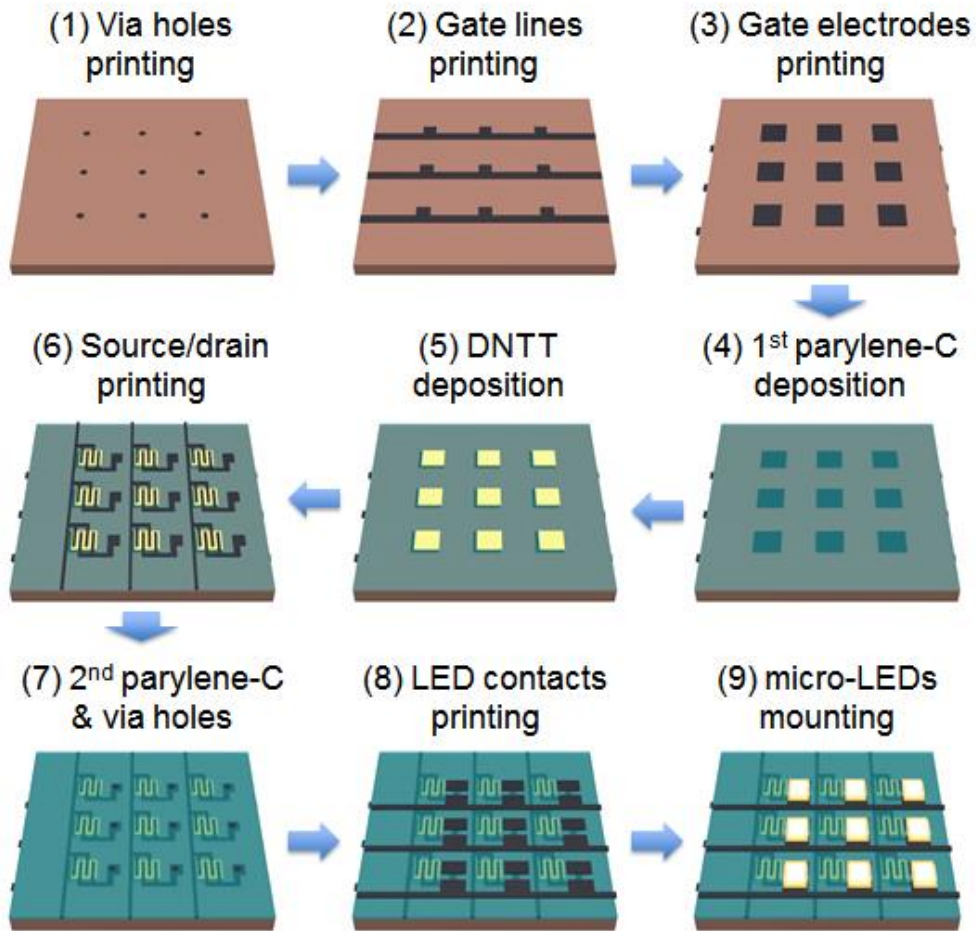

**Figure S5| Fabrication process of AM array and LED driver.** Steps (1-6) are for AM transistor array and steps (7-9) are for LED integration. Step (1), drill via-holes by CO<sub>2</sub> laser and fill in the via-holes with dilute silver paste. Step (2), screen-print gate lines on the back side of the paper. Step (3), screen-print gate electrodes on the front side of the paper. Step (4), deposit 2- $\mu$ m-thick parylene-C layer as the gate dielectric. Step (5), deposit 50-nm-thick DNTT as the active layer. Step (6), screen-print silver source electrodes, drain electrodes and drain lines together. Step (7), deposit 5- $\mu$ m-thick parylene-C layer for insulation between drain lines and source lines. Next, drill via-holes by CO<sub>2</sub> laser to expose source lines. Step (8), screen-print source contact pads (electrically connected to source electrodes through the via-holes in Step (8)) and source lines. Step (9), mount micro-LEDs before the paste dries under an optical microscope. Allow the device to dry 2 hours at room temperature prior to testing.

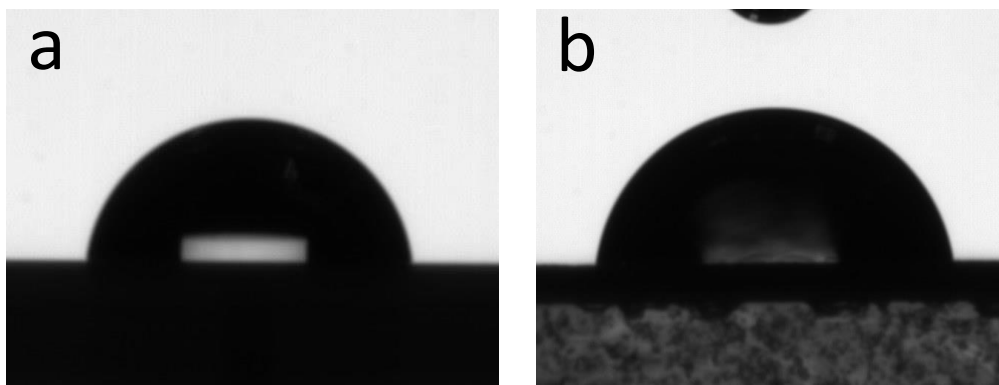

**Figure S6| Parylene-C surface energy.** (a) Parylene-C (2  $\mu\text{m}$  thick) deposited on ITO glass. Water contact angle is 87.3°. (b) Parylene-C (2  $\mu\text{m}$  thick) deposited on screen-printed silver electrode on printer paper. Water contact angle is 82.1°.

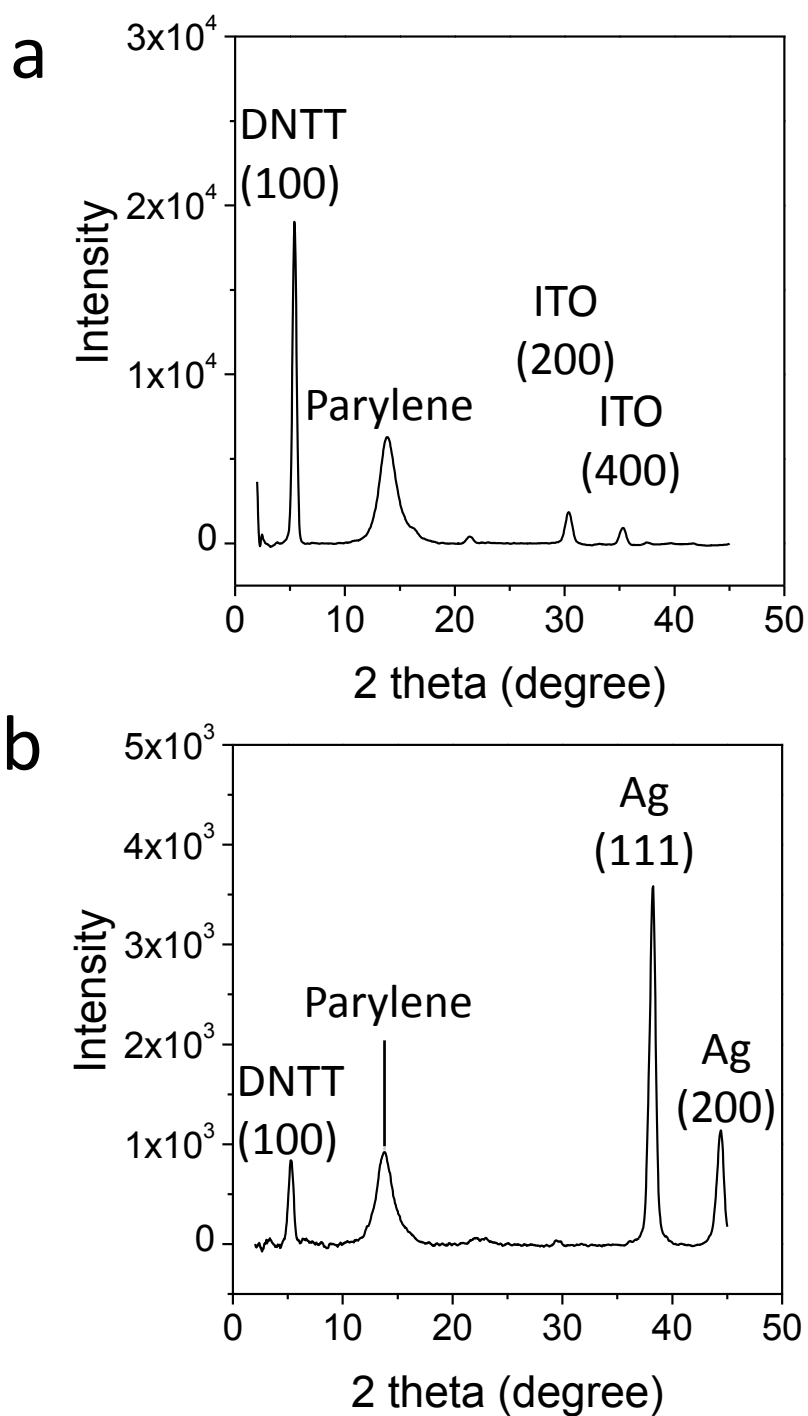

**Figure S7| Out of plane XRD of DNTT transistor on glass and paper. (a)** XRD of structure **I** (ITO glass). **(b)** XRD of structure of structure **III** (paper). Due to the paper substrate roughness, the peak intensity of DNTT is much lower than that of DNTT on ITO glass substrate.



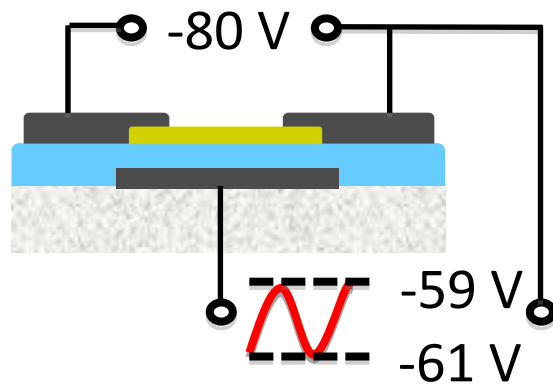

**Figure S8| Schematic circuit of cut-off frequency test.** AC voltage is applied between the gate and source, and a DC voltage is applied between the drain and source.  $I_{GS, pk-pk}$  and  $I_{DS, pk-pk}$  are acquired by a resistor combined with a lock-in amplifier.
